# Supplementary material for: A Simple Method for Measuring Carbon-13 Fatty Acid Enrichment in the Major Lipid Classes of Microalgae Using GC-MS
Source: MDPI journal article supplement (doi:10.3390/metabo6040042), 2016-11-11
Supplement: s1 [file s1]

# Supplementary Materials: A Simple Method for Measuring Carbon-13 Fatty Acid Enrichment in the Major Lipid Classes of Microalgae Using GC-MS

Sheik Nadeem Elahee Doomun, Stella Loke, Sean O'Callaghan and Damien L. Callahan

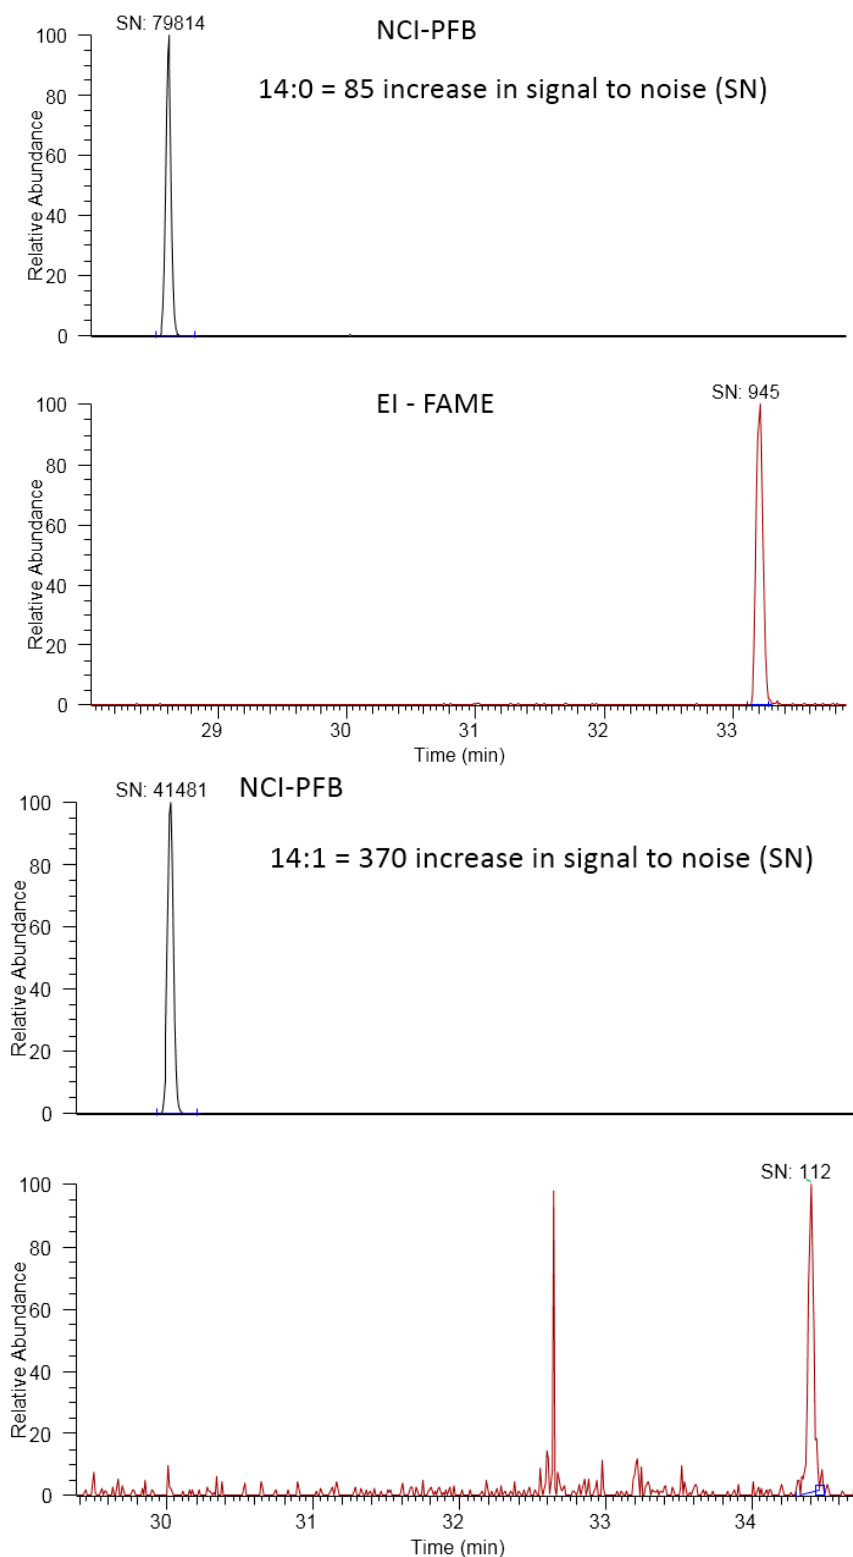

**Figure S1.** Comparison of signal to noise of EI-FAME and NCI-PFB fatty acid derivatives.
