# Supplementary material for: A Simple Method for Measuring Carbon-13 Fatty Acid Enrichment in the Major Lipid Classes of Microalgae Using GC-MS
Source: Metabolites. 2016 Nov 11;6(4):42. doi: 10.3390/metabo6040042 (PMC5192448; doi:10.3390/metabo6040042)
Supplement: Supplementary file 1 [file metabolites-06-00042-s001.zip › metabolites-151632-for publishing-supplementary-Tables S1-S3.xlsx]

## Sheet: Table S1
Table S1. MRM peak areas determined by LC-qqq-MS of GL, PL and NL fractions
Sample Name	Sample ID	MGDG(34:1)	MGDG(34:2)	MGDG(34:3)	MGDG(34:4)	MGDG(34:5)	MGDG(34:6)	MGDG(36:5)	MGDG(36:6)	DGDG(34:1)	DGDG(34:2)	DGDG(34:3)	DGDG(34:4)	DGDG(34:5)	DGDG(34:6)	DGDG(36:5)	DGDG(36:6)	PS 34:0	PS 34:1	PS 34:2	PS 36:1	PG 32:0	PG 32:1	PG 34:1	PG 36:1	PC 34:1	PC 34:2	PC 34:3	PC 34:4	PC 34:5	PC 36:0	PC 36:1	PC 36:2	PC 36:3	PC 36:4	PC 36:5	PC 36:6	PE 34_2	PE 34_3	PE 34_4	PE 36_2	PE 36_3	PE 36_4	PE 36_5	TAG58:3_16:2	TAG58:4_16:2	TAG58:5_16:2	TAG50:5_16:3	TAT50:6_16:3
SPE GL Blank 1		-----	-----	-----	-----	-----	445	-----	-----	-----	-----	-----	-----	-----	-----	-----	-----	-----	-----	-----	-----	-----	369	-----	900	2348	360	-----	-----	-----	357	2017	41967	391	-----	-----	-----	567	1132	-----	8675	-----	360	-----	134	-----	45	267	89
SPE GL Blank 2		-----	-----	-----	360	484	371	-----	-----	-----	-----	-----	-----	-----	-----	-----	-----	-----	-----	-----	-----	-----	90	360	359	6101	2034	180	-----	-----	604	6532	146980	4889	1891	157	-----	4348	5897	-----	21584	108	2611	180	45	-----	-----	196	45
SPE GL 7.5 mL		191513	4612187	11885877	26555462	30819385	56519103	3853503	4746410	201461	2198810	3413605	6081971	5109378	40757	9674557	5185735	-----	570	8649	0	768048	170158	2928994	5375	48532	28542	1533	223	81	1	3023	1613	35318	11046	3159	322	123170	1043328	74881	646	75863	381335	71521	12399	987	13645	97136	74593
SPE GL15 mL		175356	4098962	10280451	22863492	25926444	49668638	3191662	3955312	201045	2075314	3277792	5245495	11259	28326	8785942	4609583	-----	629	3715	0	2155385	422035	2810707	16608	3353	30219	2025	0	0	1	7433	1000	32992	8446	2673	689	123451	945324	43228	16549	72002	345021	55835	10075	372	8815	67963	66403
SPE PL Blank 1		-----	-----	-----	-----	-----	-----	-----	-----	-----	-----	-----	-----	-----	-----	-----	-----	-----	-----	-----	-----	-----	180	90	719	11966	3357	180	-----	-----	424	8722	137745	5515	1071	989	-----	3216	6735	-----	13077	250	-----	-----	223	-----	89	824	706
SPE PL Blank 2		-----	-----	-----	-----	-----	-----	-----	-----	-----	-----	-----	-----	-----	-----	-----	-----	-----	-----	-----	-----	-----	360	721	899	13547	5005	180	-----	-----	519	9547	151443	6243	2172	539	-----	2762	12295	-----	23194	-----	360	-----	45	-----	-----	447	178
SPE PL 5		318	3909	15750	21288	52870	97430	3888	3601	3690	34656	30634	128449	925	0	174458	92025	539	54508	1117163	719	3406027	1428233	9418705	21060	1065866	10599257	7124235	1739798	730158	15959	192289	810252	10222557	33585142	24210770	3210067	1555353	13763650	856721	665174	751171	3669688	1233211	779	-----	757	5512	5743
SPE PL 10		0	3612	3466	21244	17220	33949	2447	3129	719	23944	27795	338	161	0	98193	281	539	71098	1099240	180	1947418	752050	5046281	20335	5245990	95345233	54064606	10794045	5507197	69344	1034360	12813134	56017470	241501664	158409626	17529863	1417025	15087958	1057988	393349	898487	4318148	1276846	552	-----	245	2990	2693
SPE NL Blank 1		-----	-----	-----	-----	-----	-----	-----	-----	-----	-----	-----	-----	-----	-----	-----	-----	-----	-----	-----	-----	-----	721	539	548	6691	7110	-----	-----	-----	79	7149	150347	3340	1800	360	-----	2140	6423	-----	27725	125	359	-----	267	-----	89	589	623
SPE NL Blank 2		-----	-----	-----	-----	-----	-----	-----	-----	-----	-----	-----	-----	-----	-----	-----	-----	-----	-----	-----	-----	-----	180	125	899	9165	4276	-----	-----	-----	159	5101	134533	3501	1260	-----	-----	3895	7556	-----	26693	-----	180	-----	302364	35175	305066	2349859	2212122
SPE NL 10		-----	-----	-----	-----	-----	-----	-----	-----	-----	-----	-----	-----	-----	-----	-----	-----	-----	-----	-----	-----	90	1260	360	442	6535	2978	-----	-----	-----	319	3204	93519	1395	539	-----	-----	1445	4941	-----	16671	125	179	-----	162938	17896	184485	1299829	1161823
SPE NL 5		-----	-----	-----	-----	-----	-----	-----	-----	-----	-----	-----	-----	-----	-----	-----	-----	-----	-----	-----	-----	90	-----	360	450	5817	1151	-----	-----	-----	430	5370	98638	2661	1505	-----	-----	3122	5156	-----	18747	-----	812	-----	334	-----	-----	757	200
SPE Solvet blank 1		-----	-----	-----	-----	-----	-----	-----	-----	-----	-----	-----	-----	-----	-----	-----	-----	-----	-----	-----	-----	90	-----	539	188	6047	2792	180	-----	-----	108	6338	94506	1969	1079	180	-----	2159	4388	180	18973	-----	989	90	111	-----	89	-----	312
SPE Solvet blank 2		-----	-----	-----	1081	360	322	-----	-----	-----	-----	-----	161	-----	-----	-----	-----	-----	-----	157	-----	899	360	2062	4636	12397	19830	-----	-----	-----	1074	11154	245814	3710	5713	359	-----	2978	11036	360	100345	878	5608	1979	679	89	45	795	423
% GL carry over to PL frac
DC SPE GL 5		0.166046	0.0847537	0.13251	0.0801643	0.171548	0.172384	0.100895	0.0758679	1.83162	1.57613	0.897409	2.11196	0.018104	0	1.80327	1.77458
DC SPE GL 10		0	0.0881199	0.0337145	0.0929167	0.0664187	0.068351	0.0766685	0.0791088	0.357631	1.15375	0.847979	0.00644362	1.42997	0	1.11761	0.006096
% PL in GL frac
DC SPE PL 5																			1.04572	0.774193	0	22.5497	11.9139	31.0976	25.5223	4.55329	0.269283	0.0215181	0.0128176	0.0110935	0.00626606	1.57211	0.199074	0.345491	0.0328895	0.0130479	0.0100309	7.9191	7.58031	8.74042	0.0971174	10.0993	10.3915	5.79958
DC SPE PL 10																			0.884694	0.337961	0	110.679	56.1179	55.6986	81.672	0.0639155	0.0316943	0.00374552	0	0	0.00144209	0.718609	0.00780449	0.0588959	0.00349728	0.0016874	0.00393044	8.71198	6.26542	4.08587	4.20721	8.01369	7.99002	4.37288
%TAG in GL
DC SPE PL 5																																													4.10069	2.80597	4.4728	4.13369	3.37201
DC SPE PL 10																																													6.18333	2.07868	4.77817	5.22861	5.71541
[truncated: 16 more columns]

## Sheet: Table S2
Table S2. Peak areas for each isotopologue for the C18:3 fatty acid shown in Figure 3.
	M0	M+1	M+2	M+3	M+4	M+5	M+6	M+7	M+8	M+9	M+10	M+11	M+12	M+13	M+14	M+15	M+16	M+17	M+18
Name	Area	Area	Area	Area	Area	Area	Area	Area	Area	Area	Area	Area	Area	Area	Area	Area	Area	Area	Area
std_2	473220	94860	25691	6263.43	0	0	0	0	0	0	0	0	0	0	0	0	0	0	0
control	266065038	54045659	16127928	2691773	1047244	151352	0	8774	6182	10536	5438	20703	224603	99387	1575055	363716	588112	107565	87836.2
TAG_13C_48hr_1	152668265	31024656	11503858	2011260	682326	190278	211757	283556	648352	1502016	3494309	7507680	14839858	25221117	38151982	46018225	45299543	30132858	1.1941e+07
TAG_13C_48hr_2	56392977	11486300	4190946	716641	263523	72025	86382	81359	169455	432468	1030012	2253699	4637217	8141966	12657626	15658922	15383335	10332626	4.09939e+06
TAG_13C_48hr_3	86049001	17490888	6845690	1200621	470679	100062	100594	126464	260444	626196	1522591	3420377	7089901	12566497	19277222	23973203	23576937	16465913	6.66735e+06
TAG_13C_96hr_1	57513031	12194419	4884647	919186	441797	550310	1310330	2669450	4714881	7078432	9296583	11297243	13710837	16768655	20280571	21722006	19206996	12489583	4.71814e+06
TAG_13C_96hr_2	56399745	11950625	4531191	854492	407228	413697	1110959	2286423	4177693	6569899	8975100	11069130	13432119	16297720	19326272	20447592	17799727	11368921	4.33264e+06
TAG_13C_96hr_3	87249334	18549086	7049239	1330486	615547	856441	2197146	4140996	7194014	10158250	13174526	16036615	19587672	24390763	29446972	31808384	27858696	17942305	6.73949e+06

## Sheet: Table S3
Table S3. Relative peak ratios after matrix correction and the final % 13C calculated as described in Section 3.3. The%13C or fractional labelling (FL) was carried out using the formula as follow:
Name	M0	M+1	M+2	M+3	M+4	M+5	M+6	M+7	M+8	M+9	M+10	M+11	M+12	M+13	M+14	M+15	M+16	M+17	M+18	% 13C labelling
std_2	0.967268	-0.000654065	0.0301651	0.0048466	-0.00180097	0.000183501	-8.83488e-06	2.00619e-07	-4.78401e-09	5.00373e-10	-2.3649e-11	-9.08226e-14	2.70575e-14	9.608e-16	-8.75316e-17	-1.51548e-18	1.93257e-19	3.42285e-21	-4.54129e-22	0.3771
control	0.9507	0.00189832	0.0351521	0.000632525	0.00266986	-8.70189e-05	-5.06958e-05	3.7973e-05	1.54365e-05	3.37516e-05	1.22153e-05	7.06994e-05	0.000787976	0.000194969	0.0055703	0.000173165	0.00193666	-2.01966e-05	0.000271839	1.18745
TAG_13C_48hr_1	0.44009	0.000916885	0.0227496	0.000334514	0.00131161	0.000228927	0.00053012	0.000702658	0.0017147	0.0039675	0.00923359	0.0196892	0.0385954	0.0644647	0.0960761	0.111754	0.105741	0.0627997	0.0191004	43.5892
TAG_13C_48hr_2	0.464754	0.00118532	0.0234998	0.000237156	0.00151488	0.000233698	0.000626002	0.000535983	0.00127352	0.00329424	0.00779537	0.0169265	0.0346246	0.0597275	0.0914637	0.109196	0.102569	0.0617991	0.0187437	41.7059
TAG_13C_48hr_3	0.460804	0.000983291	0.0257528	0.000319877	0.00179556	0.000113203	0.00047005	0.000576295	0.00126741	0.0030841	0.00750271	0.0167333	0.0344211	0.0599679	0.0903366	0.108746	0.102163	0.0649156	0.0200473	41.9589
TAG_13C_96hr_1	0.316884	0.00345279	0.0188545	0.000568268	0.00183352	0.00261031	0.0066483	0.0133064	0.0231417	0.0340234	0.043814	0.0525949	0.0638768	0.0782308	0.0944128	0.098743	0.083609	0.0495071	0.0138881	48.4451
TAG_13C_96hr_2	0.325492	0.00350188	0.0178815	0.000612788	0.00176193	0.00198094	0.00596848	0.0119452	0.0215647	0.033289	0.0445758	0.0540984	0.0655336	0.0795264	0.0939042	0.0971346	0.0808404	0.0468992	0.0134887	47.8661
TAG_13C_96hr_3	0.326732	0.00374626	0.0180513	0.00062151	0.00171051	0.0028104	0.00761917	0.0139059	0.0239604	0.0328829	0.042137	0.0507657	0.0620942	0.0775824	0.0931202	0.0984546	0.0821978	0.0481759	0.0134316	47.6845
